1  
2  
3  
4  
5  
6  
7  
8  
9  
10  
11  
12  
13  
14  
15  
16  
17  
18  
19  
20  
21  
22  
23  
24  
25  
26  
27  
28  
29

**Cryo-EM structure of the human G-protein coupled receptor 1 (GPR1) – Gi protein complex bound to the chemerin C-terminal nonapeptide**

Aijun Liu<sup>1,4</sup>, Yezhou Liu<sup>1,3,4</sup>, Geng Chen<sup>1</sup>, Wenping Lyu<sup>2</sup>, Junlin Wang<sup>1</sup>, Fang Ye<sup>1</sup>,  
Lizhe Zhu<sup>2</sup>, Yang Du<sup>1</sup>, Richard D. Ye<sup>1,3,\*</sup>

<sup>1</sup>Kobilka Institute of Innovative Drug Discovery, and <sup>2</sup>Warshel Institute for Computational Biology, School of Medicine, The Chinese University of Hong Kong, Shenzhen, Guangdong, 518172, P.R. China; <sup>3</sup>Shenzhen Bay Laboratory, Shenzhen, Guangdong, 518055, P.R. China

<sup>4</sup>These authors contributed equally to this work.

\*Corresponding author: Prof. Richard D. Ye ([richardye@cuhk.edu.cn](mailto:richardye@cuhk.edu.cn))

30 **ABSTRACT**

31 Chemerin is a chemoattractant and adipokine protein that acts on G protein-coupled  
32 receptors including chemokine-like receptor 1 (CMKLR1), G-protein coupled receptor  
33 1 (GPR1) and C-C chemokine receptor-like 2 (CCRL2), mainly through its C-terminal  
34 peptide containing the sequence YFPGQFAFS (C-terminal nonapeptide or C9).  
35 Previous studies suggest that the three receptors respond to chemerin and C9  
36 differently, with activation of the Gi signaling pathway through CMKLR1 but not  
37 GPR1 and CCRL2. Recently we reported a cryo-EM structure of human CMKLR1 in  
38 complex with Gi proteins and the C9 peptide. To identify structural differences  
39 among these receptors in ligand binding and Gi protein signaling, here we report a  
40 high-resolution cryo-EM structure of human GPR1-Gi complex bound to C9. Our  
41 structural and functional results show that GPR1 is able to respond to the C9 peptide  
42 with activation of the Gi signaling pathway and forms complex with a Gi protein.  
43 Similar to the CMKLR1-C9 structure, C9 adopts a C-terminus-in and S-shaped pose  
44 in the binding pocket. C9 is stabilized through hydrophobic interactions involving its  
45 Y1, F2, Q5, F6 and F8, and polar interactions between the P3, G4, Q5, F6, F8, S9  
46 and residues lining the GPR1 binding pocket. An analysis of the GPR1-Gi protein  
47 interface found high similarities to the CMKLR1-Gi complex, and site-directed  
48 mutagenesis with functional verifications support GPR1 as a Gi-coupling receptors.  
49 These findings provide a structural basis of ligand recognition and Gi protein  
50 coupling by GPR1, and may help to understand the respective functions of the three  
51 chemerin receptors.

52  
53 **Keywords:** GPCRs, chemerin, G proteins, cryo-EM

54

## 55 MAIN TEXT

56

### 57 Introduction

58

59 Chemerin is a small protein encoded by the *retinoic acid receptor responder 2* gene.

60 Chemerin is mainly expressed in adipose tissue, liver, lung and skin (Bozaoglu et al.,

61 2007; Goralski et al., 2007; Lehrke et al., 2009). The role of chemerin was initially

62 identified as a chemoattractant of inflammatory cells following its discovery in

63 psoriasis (Kennedy & Davenport, 2018a). Chemerin was subsequently found to act

64 as an adipokine (Bozaoglu et al., 2007; Goralski et al., 2019; Goralski et al., 2007;

65 Helfer & Wu, 2018). Secretion of chemerin requires removal of the N-terminal

66 signaling peptides, resulting in pro-chemerin (amino acid 21-163) with a low

67 biological activity. Further proteolytic removal of six amino acids from the C-terminus

68 (158-163) leads to chemerin<sub>21-157</sub> with full bioactivity (Wittamer et al., 2003). C-

69 terminal synthetic fragments of human chemerin, including chemerin<sub>149-157</sub> (C9),

70 chemerin<sub>145-157</sub> (C13) and chemerin<sub>138-157</sub> (C20), show comparable biological

71 activity to chemerin<sub>21-157</sub> (Meder et al., 2003; Zabel, Allen, et al., 2005; Zabel,

72 Silverio, et al., 2005).

73

74 To date, 3 chemerin receptors have been identified, namely chemokine-like receptor

75 1 (CMKLR1), G protein-coupled receptor 1 (GPR1) and C-C chemokine receptor-like

76 2 (CCRL2) (Barnea et al., 2008; Zabel et al., 2008). CMKLR1 responds to chemerin

77 and the C9 peptide with activation of the G protein (G<sub>i</sub>) pathway and the  $\beta$ -arrestin

78 pathway. In contrast, CCRL2 binds chemerin but does not mediate its

79 transmembrane signaling (Kennedy & Davenport, 2018a). The biological functions of

80 GPR1 as a chemerin receptor remains unclear. GPR1 was originally identified as an

81 orphan receptor (Marchese et al., 1994). It was subsequently found as a chemerin

82 receptor but published studies of its pharmacological properties vary widely. Using a

83 reporter assay (TANGO) for measurement of  $\beta$ -arrestin activation, Barnea *et al* found

84 that GPR1 activation is biased towards the  $\beta$ -arrestin pathway when compared with

85 CMKLR1 (Barnea et al., 2008). Another study showed that both CMKLR1 and GPR1

86 could activate the  $\beta$ -arrestin pathway but the amplitude of the CMKLR1-mediated

87 signaling was larger (De Henau et al., 2016). In terms of G protein activation,

88 published studies showed downstream activities of RhoA/ROCK, G $\alpha_{q/11}$  and G $\alpha_{i/o}$ ,

89 but it was not clear which one is the dominant G protein for functional coupling

90 (Rourke et al., 2015). Other studies have shown that human GPR1 was involved in  
91 human immunodeficiency virus replication (Samson et al., 1998; Shimizu et al.,  
92 2009; Tokizawa et al., 2000), in glucose homeostasis, cardiovascular diseases,  
93 steroid hormone synthesis and reproductive biology (Caulfield et al., 2003; Ernst &  
94 Sinal, 2010; Karagiannis et al., 2013; Kennedy & Davenport, 2018a; Neves et al.,  
95 2018; Rourke et al., 2014), suggesting that the downstream signaling network of  
96 GPR1 may be diverse.

97

98 GPR1 and CMKLR1 share more than 80% of sequence homology, yet their  
99 respective functions elicited by chemerin may be different. CMKLR1 is often  
100 considered a balanced receptor mediating all biological functions of chemerin. In a  
101 recent study, we reported the cryo-EM structure of CMKLR1-Gi complex bound to  
102 the C9 peptide of chemerin (Wang et al., 2023) that illustrates a clearly defined  
103 binding pocket for the C-terminal peptide of chemerin as well as an interface for Gi  
104 protein interaction. For GPR1, studies support the ligand-induced  $\beta$ -arrestin  
105 recruitment, yet current findings on the activation of G protein signaling by GPR1 are  
106 inconsistent and controversial (De Henau et al., 2016; Kennedy & Davenport,  
107 2018a). Given the discrepancies among current understandings of GPR1  
108 downstream signaling pathways, it is important to understand how chemerin binds to  
109 GPR1 and whether the binding event can be translated into G protein activation. To  
110 this end, we have determined the cryo-EM structure of GPR1 bound to C9, in  
111 complex with heterotrimeric Gi proteins. Our results demonstrated the structural  
112 basis for GPR1-dependent Gi protein activation.

113

114

115

116

## 117 **Methods**

118

### 119 **Expression vector design**

120 Human GPR1 was cloned into a pFastBac vector (Invitrogen, Carlsbad, CA, USA)  
121 for protein expression towards purification. Specifically, to improve the expression  
122 yield as well as the protein stability, the coding sequence of human GPR1 was fused  
123 with an N-terminal HA signal peptide followed by a FLAG tag, a human rhinovirus 14  
124 3C (HRV-3C) protease cleavage site (LEVLFGGP) and the thermostabilized  
125 apocytochrome b(562)RIL (BRIL) fusion protein (Chun et al., 2012). Human  
126 dominant negative Gai1 (DNGai1), generated by site-directed mutagenesis of  
127 G203A and A326S in Gai1, was cloned into a pFastBac vector. N-terminal 6×His-  
128 tagged Gβ1 and Gy2 were cloned into a pFastBac-Dual vector. scFv16 was fused  
129 with a N-terminal GP67 signal peptide and a C-terminal 8× His tag, and the coding  
130 sequence was then cloned into a pFastBac vector.

131

132 For functional assays, the full-length human GPR1 cDNA were cloned into  
133 pcDNA3.1(+) vector (Invitrogen) with an N-terminal FLAG tag. Point mutations were  
134 introduced using homologous recombination. Two fragments of GPR1 separated at  
135 mutated positions were amplified using PCR and then assembled into pre-cut  
136 pcDNA3.1(+) vectors using the ClonExpress Ultra One Step Cloning Kit (Vazyme  
137 Biotech; C115). Plasmids with GPR1 mutations were confirmed by DNA sequencing  
138 (GENEWIZ).

139

140

### 141 **Expression and purification of the GPR1-Gi complexes**

142 The baculoviruses of GPR1, DNGai1, Gβ1 and Gy2 were generated and amplified  
143 using the Bac-to-Bac baculovirus expression system vector. The *Sf9* cells were  
144 cultured in SIM SF Expression Medium (Sino Biological). When the cell density  
145 reached  $3.5 \times 10^6$  cells/mL (in total 2 liters), the three types of baculoviruses (GPR1,  
146 DNGai1, Gβ1γ2) were co-expressed in *Sf9* cells at a ratio of 1:4:2 (total volume of  
147 baculoviruses: 26 mL). After infection for 60 hrs, the cells were collected by  
148 centrifugation at  $2,000 \times g$  for 15 mins and kept frozen at  $-80^\circ\text{C}$  for complex  
149 purification.

150

151 For the purification of C9 bound GPR1-Gi protein complexes, cell pellets from the 2L  
152 culture were resuspended in 150 mL lysis buffer (10 mM Tris pH 7.5, 1 mM EDTA,  
153 2.5 μg/mL leupeptin and 160 μg/mL benzamidine, 4 μM C9 peptide and 1 mg/mL  
154 iodoacetamide) for 30 mins at room temperature. The lysate was centrifuged for 15  
155 mins at  $18,000 \times g$ , and pellet was homogenized in 150 mL solubilization buffer (20  
156 mM HEPES pH 7.5, 100 mM NaCl, 10% glycerol, 1% dodecylmaltoside (DDM), 0.1%  
157 cholesteryl hemisuccinate (CHS), 2.5 μg/mL leupeptin and 160 μg/mL benzamidine,  
158 4 μM C9 peptide, 1 mg/mL iodoacetamide, 2 mg scFv16, 25 mU/mL apyrase) using a  
159 dounce-homogenizer. The sample was stirred for 2 hrs at  $4^\circ\text{C}$  and then centrifuged  
160 for 30 mins at  $18,000 \times g$  to remove the insoluble debris. The solubilized supernatant  
161 fraction was incubated with 2 mL anti-FLAG affinity resin (GenScript Biotech,  
162 Piscataway, NJ) and stirred at  $4^\circ\text{C}$  for 2 hrs. Then, the resin was manually loaded  
163 onto a gravity-flow column and extensively washed with the FLAG wash buffer (W1:  
164 20 mM HEPES pH 7.5, 0.1% DDM, 0.01% CHS, 100 mM NaCl, 2 mM  $\text{CaCl}_2$ , 4 μM  
165 C9 peptide. W2: 20 mM HEPES pH 7.5, 0.2% lauryl maltose neopentyl glycol  
166 (LMNG), 0.02% CHS, 100 mM NaCl, 2 mM  $\text{CaCl}_2$ , 4 μM C9 peptide) by mixing W1

167 and W2 buffer in the following ratios: 5 mL:5 mL, 2 mL:8 mL, 1 mL:9 mL, 0.5 mL:9.5  
168 mL, 0 mL:10 mL, respectively. The GPR1-Gi complexes attached to the resin were  
169 further eluted with 10 mL elution buffer (20 mM HEPES pH 7.5, 0.01% LMNG,  
170 0.002% CHS, 100 mM NaCl, 4  $\mu$ M C9 peptide, 5 mM EDTA, 0.2 mg/ml FLAG  
171 peptide). Eluted protein complexes were concentrated to 400  $\mu$ L in an Amicon®  
172 Ultra-15 Centrifugal Filter Unit (Millipore, Burlington, MA) and further subjected to a  
173 size exclusion chromatography through a Superdex 200 Increase 10/300 column  
174 (GE Healthcare Life Sciences, Sweden) equipped in an AKTA FPLC system with  
175 running buffer (20 mM HEPES pH 7.5, 0.01% LMNG, 0.002% CHS, 100 mM NaCl, 4  
176  $\mu$ M C9 peptide). Eluted fractions containing GPR1-Gi complexes were re-pooled and  
177 concentrated as described above before being flash frozen in liquid nitrogen and  
178 stored at  $-80^{\circ}\text{C}$ .

179

### 180 **Expression and purification of scFv16**

181 The antibody fragment scFv16 was expressed as a secretory protein and purified as  
182 previously described (2). Briefly, *Trichoplusia ni* Hi5 insect cells were cultured to  
183 reach a density of  $3.5 \times 10^6$  cells/mL. Cells were then infected with scFv16  
184 baculovirus at a ratio of 1:50. After 60 hrs of culture, the supernatant was collected  
185 and loaded onto a Ni-NTA resin column. The column was washed with 20 mM  
186 HEPES (pH 7.5), 500mM NaCl, and 20 mM imidazole, and then subjected to elution  
187 by 20 mM HEPES (pH 7.5), 100 mM NaCl, and 250 mM imidazole. The eluted  
188 proteins were concentrated and subjected to size-exclusion chromatography using a  
189 Superdex 200 Increase 10/300 column (GE Healthcare). Finally, the purified scFv16  
190 protein with a monomeric peak was concentrated and flash frozen in liquid nitrogen  
191 and stored at  $-80^{\circ}\text{C}$  for further use.

192

### 193 **Cryo-EM sample preparation and data collection**

194 For cryo-EM sample preparation of the C9-GPR1-Gi-scFv16 complex, amorphous  
195 alloy film (CryoMatrix nickel titanium alloy film, R1.2/1.3, Zhenjiang Lehua Electronic  
196 Technology Co., Ltd.) was glow discharged in a Tergeo-EM plasma cleaner. 3  $\mu$ L  
197 purified complex sample was loaded on the grid and blotted for 3 s with a blotting  
198 force of 0, and then flash-frozen in liquid ethane cooled by liquid nitrogen using  
199 Vitrobot Mark IV (Thermo Fisher Scientific, Waltham, MA). For data collection, cryo-  
200 EM data were collected at the Kobilka Cryo-EM Center of The Chinese University of  
201 Hong Kong, Shenzhen, on a 300 kV Titan Krios Gi3 microscope (Thermo Fisher  
202 Scientific). The raw movies were then recorded using a Gatan K3 BioQuantum  
203 Camera at the magnification of 105,000, with the pixel size of 0.83 Å. A GIF  
204 Quantum energy filter was applied to exclude inelastically scattered electrons  
205 (Gatan, USA) using a slit width of 20 eV. The movie stacks were acquired with a total  
206 exposure time of 2.5 s fragmented into 50 frames (0.05 s/frame). The defocus range  
207 were from  $-1.2$  to  $-2.0$   $\mu\text{m}$ . The semi-automatic data acquisition was performed  
208 using SerialEM. A total of 3,609 image stacks were collected in 60 hrs.

209

210

### 211 **Image processing and model building**

212 Data processing was performed with cryoSPARC 3.3.1 (Structura Biotechnology  
213 Inc., Toronto, Canada). Patch motion correction and patch CTF estimation were  
214 firstly applied to the image stacks. 2,280,697 particles were auto-picked. 2D  
215 classification was performed, resulting in 732,629 particles selected for *ab initio*  
216 reconstruction. After 3 rounds heterogeneous refinements, a final set of 339,859



217 particles were exported to non-uniform refinement and local refinement, yielding a  
218 map with global resolution of 2.90 Å.

219

220 The predicted structure GPR1 on AlphaFold database was used to build the initial  
221 model of the receptor. The coordinates of Gi1 and scFv16 from GPR88 (PDB ID:  
222 7WXZ) were applied as templates. All models were docked into the EM density map  
223 using UCSF Chimera version 1.12, followed by iterative manual building in Coot-  
224 0.9.2 and refinement in Phenix-1.18.2. The statistics of the final model were further  
225 validated by Phenix-1.18.2. Structure figures were generated by Chimera or PyMOL  
226 (Schrödinger, Inc., New York, NY). The statistics of data-collection and structure-  
227 refinement were shown in Supplementary Table 1.

228

### 229 **Molecular modeling and molecular dynamic simulation**

230 Protonation state of the GPR1 was assigned by the web server H++  
231 (Anandakrishnan et al., 2012) assuming pH 7.4, and charmm36m (Anandakrishnan  
232 et al., 2012) force field was employed in all simulations. After energy minimization,  
233 membrane relaxation, and equilibrium simulation (Huang et al., 2017), ten  
234 independent 1- $\mu$ s long production MD simulations were carried out for C9/GPR1  
235 complex. 50,000 conformations were collected in total from the assemble of  
236 trajectories. Hydrogen bonds were identified based on cutoffs for the Donor-  
237 H $\cdots$ Acceptor distance and angle. The criterion employed was angle  $> 120^\circ$  and  
238 H $\cdots$ Acceptor distance  $< 2.5$  Å in at least 10% of the trajectory.

239

### 240 **G protein dissociation assay**

241 G protein activation was tested by a NanoBiT-based G protein dissociation assay  
242 (Inoue et al., 2019). HEK293T cells were plated in a 24-well plate 24 hrs before  
243 transfection. Lipofectamine™ 3000 (Invitrogen, L3000001) transfection was  
244 performed with a mixture of 92 ng pcDNA3.1 vector encoding human GPR1  
245 (WT/mutants) or WT human CMKLR1 for comparison, 46 ng pcDNA3.1 vector  
246 encoding G $\alpha$ i1-LgBiT, 230 ng pcDNA3.1 vector encoding G $\beta$ 1 and 230 ng pcDNA3.1  
247 vector encoding SmBiT-G $\gamma$ 2 (per well in a 24-well plate), respectively. After 24 hrs  
248 incubation, the transfected cells were collected and resuspended in HBSS containing  
249 20 mM HEPES. The cell suspension was loaded onto a 384-well culture white plate  
250 (PerkinElmer Life Sciences, Waltham, MA) at a volume of 20  $\mu$ L and loaded with 5  
251  $\mu$ L of 50  $\mu$ M coelenterazine H (Yeasen Biotech, Shanghai, China). After 2 hrs  
252 incubation at room temperature, the baseline was measured using a Envision 2105  
253 multimode plate reader (PerkinElmer, Waltham, MA, USA). Then, C9 peptides  
254 (ChinaPeptides, Shanghai, China) were added to the cells to different concentration.  
255 The ligand-induced luminescence signals were measured 15 mins after ligand  
256 addition and divided by the initial baseline readouts. The fold changes of signals  
257 were further normalized to PBS-treated signal and the values ( $EC_{50}$ ) were expressed  
258 as a function of different concentrations of C9 peptide ligand based on three  
259 independent experiments, each with triplicate measurements.

260

### 261 **cAMP assay**

262 Wild-type human GPR1 and its mutants, or wild-type human CMKLR1 for  
263 comparison, were transiently expressed in HeLa cells 24 hrs prior to collection. The  
264 cells were resuspended in HBSS buffer plus 5 mM HEPES, 0.1% BSA (w/v) and 0.5  
265 mM 3-isobutyl-1-methylxanthine and loaded onto 384-well plates. Different  
266 concentrations of C9 peptide were prepared with 2.5  $\mu$ M forskolin in the

267 abovementioned buffer. The cells were stimulated by the ligands and 2.5  $\mu$ M  
268 forskolin for 30 mins in a cell incubator. Intracellular cAMP levels were measured  
269 with the LANCE Ultra cAMP kit (PerkinElmer, TRF0263) following the manufacturer's  
270 instructions. In the measurements, signals of time resolved-fluorescence resonance  
271 energy transfer (TR-FRET) were detected by a EnVision 2105 multimode plate  
272 reader (PerkinElmer). Intracellular cAMP levels were calculated according to the TR-  
273 FRET signals of the samples and cAMP standards.

274

### 275 **$\beta$ -arrestin recruitment assay**

276 For NanoBiT-based  $\beta$ -arrestin recruitment assay, HEK293T cells were seeded in a  
277 24-well plate 24 hrs before transfection. Cells are co-transfected with GPR1-WT-  
278 smBiT or CMKLR1-WT-smBiT (400 ng/well) and LgBiT- $\beta$ -Arr1 or LgBiT- $\beta$ -Arr2 (200  
279 ng/well) by Lipofectamine™ 3000 (Invitrogen) for 24 hrs. Cells were collected and  
280 resuspended in HBSS buffer containing 20 mM HEPES, and then 20  $\mu$ L of cell  
281 suspension was loaded onto a 384-well white plate at a concentration of  $2 \times 10^4$   
282 cells/well. Test samples were further loaded with coelenterazine H to a final  
283 concentration of 10  $\mu$ M. After 25 mins incubation at 37 °C, the samples were  
284 measured for baseline luminescence using Envision 2105 multimode plate reader  
285 (PerkinElmer). Different concentrations of C9 peptide were added to the wells and  
286 the luminescence signals were detected for 30 mins. The signal readouts were  
287 further normalized to PBS-treated signal and the values ( $EC_{50}$ ) were expressed as a  
288 function of different concentrations of C9 peptide ligand based on three independent  
289 experiments, each with triplicate measurements.

290

### 291 **IP one accumulation assay**

292 Wild-type GPR1 and its mutants, and wild-type human CMKLR1 for comparison,  
293 were transiently expressed in HEK293T cells for 24 hrs. IP one accumulation was  
294 tested using IP-One Gq HTRF kit (Cisbio). The cells were resuspended in the  
295 stimulation buffer (Cisbio) and incubated with different concentrations of C9 peptide  
296 diluted in the stimulation buffer for 30 mins at 37 °C. The accumulation of IP one was  
297 further determined following the manufacturer's protocols. Fluorescence intensities  
298 were measured on a Envision 2105 multimode plate reader (PerkinElmer).  
299 Intracellular IP one levels were calculated according to the fluorescence signals of  
300 the samples and IP one standards.

301

### 302 **GPR1 expression level determination by flow cytometry**

303 HEK293T cells were transfected with FLAG-tagged WT or mutant GPR1 expression  
304 plasmids for 24 hrs at 37°C. Then the cells were harvested and washed in HBSS  
305 containing 5% BSA for three times on ice. The cells were then incubated with a  
306 FITC-labeled anti-FLAG antibody (M2; Sigma, Cat #F4049; 1:50 diluted by HBSS  
307 buffer) for 30 mins on ice and washed with HBSS. The FITC fluorescence signals  
308 demonstrating the antibody-receptor complex on the cell surface were quantified by  
309 flow cytometry (CytoFLEX, Beckman Coulter, Brea, CA). Relative expression levels  
310 of GPR1 mutants were represented according to the fluorescence signals.

311

### 312 **Statistical analysis**

313 The data were analyzed with Prism 9.5.0 (GraphPad, San Diego, CA). For dose-  
314 response analysis, the curves were plotted with the log[agonist] vs. response  
315 equation (three parameters) in the software. For cAMP, IP one, and G-protein  
316 dissociation assays, data points were presented as the percentages (mean  $\pm$  SEM)



317 of the maximal response level for each sample, from at least three independent  
318 experiments, as indicated in figure legends. For the  $\beta$ -arrestin recruitment assay,  
319 data were presented as raw chemiluminescence signals (mean  $\pm$  SEM) from at least  
320 three independent experiments. The EC<sub>50</sub> values were obtained from the dose-  
321 response curves. For cell surface expression, data points were presented as the  
322 percentages (mean  $\pm$  SEM) of the flow cytometry fluorescence signals of WT GPR1.  
323 For statistical comparisons, Analysis of Variance (ANOVA) was performed using the  
324 one-way method. A  $p$  value of 0.05 or lower is considered statistically significant.  
325  
326  
327  
328

## 329 **Results**

330

### 331 **GPR1 can activate Gi protein responses.**

332 It has been long controversial about the downstream signaling events elicited by the  
333 activation of GPR1. We hence compared GPR1 and CMKLR1 by performing G  
334 protein dissociation assay, cAMP inhibition assay targeting the G $\alpha$ i responses, IP  
335 one accumulation assay targeting G $\beta\gamma$  downstream events and  $\beta$ -arrestin  
336 recruitment assays. Although to a significantly less extent in comparison with  
337 CMKLR1, GPR1 can elicit cAMP inhibition (Fig. 1A). In NanoBiT G protein  
338 dissociation assay, C9 activates GPR1 and CMKLR1 with a similar EC<sub>50</sub>, although  
339 the efficacy is lower for GPR1 (Fig. 1B). IP one accumulation as a downstream  
340 signaling event of G $\beta\gamma$  proteins observed a lower EC<sub>50</sub> for GPR1 with a similar  
341 amplitude (Fig. 1C). These results identify that GPR1 can activate a weak G protein  
342 response. We further extended our functional test to  $\beta$ -arrestin recruitment. Both  
343 CMKLR1 and GPR1 showed a preference in recruiting  $\beta$ -arrestin 1 (Fig. 1D). GPR1  
344 experienced a significant lower efficacy of  $\beta$ -arrestin responses, with nearly no  
345 recruitment of  $\beta$ -arrestin 2. This finding corresponds to previous discoveries by other  
346 groups with respect to downstream signaling events of chemerin receptors (Barnea  
347 et al., 2008; De Henau et al., 2016; Degroot et al., 2022; Fischer et al., 2021;  
348 Kennedy & Davenport, 2018b; Rourke et al., 2015; Wittamer et al., 2003).

349

### 350 **Cryo-EM structure of the GPR1-Gi complex.**

351 The GPR1-Gi-scFv16 protein complex bound to the chemerin nonapeptide C9 (149-  
352 YFPGQFAFS-157) was prepared and the structure was determined by cryo-EM to  
353 an overall resolution of 2.90 Å (Fig. 2A and B, Fig. S1 and S2). The antibody  
354 fragment scFv16 was used for stabilization of the C9-GPR1-Gi complex (Maeda et  
355 al., 2018). Heterotrimeric Gi proteins, including G $\alpha$ i, G $\beta$  and G $\gamma$ , associate with the  
356 receptor to form the complex. The ligand-binding pocket of GPR1 was surrounded by  
357 transmembrane (TM) helices 2, 3, 4, 6, 7 and the first, second and third extracellular  
358 loops (ECL1, ECL2 and ECL3) (Fig. 2A). The C9 peptide assumes a posture with its  
359 C terminus inserted to the binding pocket (Fig. 2 B-D), and the peptide ligand takes  
360 an “S”-shape in the binding pocket, providing interactions between the ligand and the  
361 receptor residues. Specifically in this structural model (Fig. 2 C-E), the N-terminal Y1  
362 and F2 of the C9 peptide show hydrophobic interactions with L186<sup>ECL2</sup>, H273<sup>ECL3</sup>,

363 Y188<sup>ECL2</sup> and I272<sup>6.61</sup>[superscripts indicate the Ballesteros-Weinstein numbering  
364 scheme for GPCRs (Ballesteros & Weinstein, 1995)]. P3 in the peptide backbone  
365 formed polar interactions with N189<sup>ECL2</sup> and G4 has polar interactions formed  
366 between its backbone amide group and E269<sup>6.58</sup>. Q5 with its backbone carbonyl  
367 oxygen formed polar interaction with Y96<sup>2.63</sup>. The aromatic ring of F6 showed  
368 nonpolar interactions with F101<sup>ECL1</sup> and Q283<sup>7.32</sup>, and the backbone carbonyl oxygen  
369 has polar interactions with Y93<sup>2.60</sup>. F8 with its aromatic ring showed extensive  
370 hydrophobic interactions with residues P287<sup>7.36</sup>, I286<sup>7.35</sup>, C187<sup>ECL2</sup>, T290<sup>7.39</sup>, A117<sup>3.32</sup>  
371 and M121<sup>3.36</sup> to stabilize the peptide ligand in the binding pocket. S9 at the C-  
372 terminal end of the C9 peptide experienced polar interactions extensively with  
373 S114<sup>3.29</sup>, Q118<sup>3.33</sup> and R176<sup>4.64</sup> with its carbonyl and side chain oxygens. To note,  
374 Q<sup>3.33</sup> is an amino acid residue conserved in some chemoattractant GPCRs including  
375 FPR1 and FPR2 (Chen et al., 2022; Chen et al., 2020; Zhu et al., 2022; Zhuang et  
376 al., 2020; Zhuang et al., 2022). The aromatic ring of F8 inserts deep into the binding  
377 pocket, pointing just above the “toggle switch” W259<sup>6.48</sup> of GPR1 for G protein  
378 activation (Weis & Kobilka, 2018). By comparing between the structures of GPR1-C9  
379 and CMKLR1-C9, the C9 ligand bound to GPR1 was measured to have an average  
380 of 1.2 Å upward shift, and the residues in contact with the ligand were closer to the  
381 extracellular loop of GPR1 (Fig. S3). These binding site findings suggest that despite  
382 the ligand C9 peptide takes a similar pose in the binding pocket, the binding of C9 to  
383 GPR1 is shallower than that in the case of CMKLR1.

384

### 385 **Functional analysis of the GPR1-C9 interaction.**

386 Following the structural model of GPR1, site-directed mutagenesis of the receptor  
387 was conducted to confirm the interactions between the ligand C9 peptide and the  
388 receptor binding pocket. Alanine substitutions of the key residues in the binding  
389 pocket of GPR1 were followed by functional assays of the mutants in cAMP inhibition  
390 assay and G protein dissociation assay respectively to measure the activation of  
391 GPR1 by the C9 peptide (Fig. 3). The results from these two assays were consistent.  
392 The alanine substitution of residues forming polar interactions with the C9 peptide,  
393 including N189<sup>ECL2</sup>, E269<sup>6.58</sup>, Y96<sup>2.63</sup>, Y93<sup>2.60</sup>, S114<sup>3.29</sup>, Q118<sup>3.33</sup> and R176<sup>4.64</sup>,  
394 resulted in a remarkable decrease in the potency of the ligand (Fig. 3, A-C and E-G).  
395 Of note, Y96<sup>2.63</sup>A and E269<sup>6.58</sup>A mutants completely diminished the response. For  
396 the extensive polar interactions between S9 of the C9 peptide and the receptor, we

397 observed that single point mutations of S114<sup>3.29</sup>, Q118<sup>3.33</sup> or R176<sup>4.64</sup> did not  
398 completely eliminate the response. This could be due to the flexibility at S9 of the  
399 ligand where multiple hydrogen bonds may form alternatively between the carbonyl  
400 and side chain oxygens of S9 and S114<sup>3.29</sup>, Q118<sup>3.33</sup> or R176<sup>4.64</sup> of GPR1 (Fig. 3, A,  
401 B, E and F). Indeed, by introducing a triple mutation at S114-Q118-R176, the cAMP  
402 inhibition and G protein dissociation responses were completely abolished (Fig. 3, D  
403 and H). These results altogether supported the role of the substituted amino acid  
404 residues in hydrogen bond formation with P3, G4, Q5, F6 and S9 of the C9 peptide.

405

406 In addition to polar interactions, hydrophobic interactions also play an important role  
407 in C9 interaction with GPR1. Mutations of some nonpolar residues in the binding  
408 pocket of GPR1, including L186<sup>ECL2</sup>, Y188<sup>ECL2</sup>, Q283<sup>7.32</sup> and T290<sup>7.39</sup>, reduced the  
409 potency of cAMP inhibition and G protein responses (Fig. 3, C, D, G and H). And a  
410 greater reduction in functional efficacy was observed for T290<sup>7.39</sup>A, as both cAMP  
411 inhibition and G protein dissociation were almost completely lost. Taken together,  
412 site-directed mutagenesis and corresponding functional assays results are in line  
413 with the cryo-EM structural model of C9-bound GPR1.

414

### 415 **Thermodynamic stability of GPR1-C9 interface**

416 Full-atom molecular dynamics (MD) simulations were performed for GPR1-C9  
417 complex at room temperature (10 replicas of 1- $\mu$ s-long simulation). In these MD  
418 trajectories, the complex captured by Cryo-EM were overall stable under  
419 thermodynamic perturbation (Fig. S5), and the binding pose of the C9 peptide were  
420 well kept through the assemble of 1- $\mu$ s trajectories (Fig. 4). Except the hydrophobic  
421 residue F2, we observed that 8 residues out of the 9 residues on C9 peptide form  
422 hydrogen-bonds (H-bonds) with GPR1 (Fig. 4). The residues close to the C-terminal  
423 of the C9 peptide formed several H-bonds with Y96<sup>2.63</sup>, N189<sup>ECL2</sup>, R176<sup>4.64</sup>, S114<sup>3.29</sup>,  
424 Y262<sup>6.51</sup>, and K210<sup>5.42</sup>. Among these, N189<sup>ECL2</sup> and Y96<sup>2.63</sup> also formed H-bonds  
425 with P3 and Q5 on the C9 peptide. The N-terminal of C9 peptide was more likely to  
426 interact with negatively charged E269<sup>6.58</sup>. The latter also interacted with G4, while  
427 the G4 formed a stable H-bond with R176<sup>4.64</sup> (Fig. 4B). These interactions resulted in  
428 a complex network between C9 and the receptor, which rationalized the  
429 thermodynamic stability of the C9 peptide in the binding pocket of GPR1.

430

431 By comparing the EC<sub>50</sub> of cAMP assays, we found that the N189<sup>ECL2</sup> and Y96<sup>2.63</sup>,  
432 which have the top 2 occupancy on single H-bond (Fig. 4A), are the most functionally  
433 important (-logEC<sub>50</sub> = 0, i.e., no effect on cAMP inhibition). Another functional  
434 important residue is E269<sup>6.58</sup> (-logEC<sub>50</sub> = 0), which has less single H-bond  
435 occupancy (<0.6, Fig. 4A), but with the highest overall H-bond occupancy  
436 considering all associated H-bonds (>1.5). Therefore, we propose that the functional  
437 effects of the C9 peptide is highly related to the polar interactions with GPR1.

438

### 439 **Activation mechanism of GPR1-Gi complex.**

440 To investigate the conformational changes associated with the activation of GPR1,  
441 we compared the structure of active GPR1 and an antagonist-bound inactive C5aR  
442 (C5aR-PMX53, PDB ID: 6C1R) as the most homologous GPCR to GPR1, or a C9-  
443 bound active CMKLR1 (CMKLR1-C9, PDB ID: 7YKD), respectively (Fig. 5). From the  
444 comparison between the active and inactive forms of receptors, an outward  
445 movement of TM5 and TM6, and an inward movement of TM7 were observed (Fig.  
446 5A). Specifically, for the D<sup>3.49</sup>-R<sup>3.50</sup>-Y<sup>3.51</sup> motif conserved for G protein activation  
447 among Class A GPCRs, GPR1 presents the motif as D134-H135-Y136 and C5aR  
448 presents it as DRF. Both receptors showed no interaction between H<sup>3.50</sup>/R<sup>3.50</sup> and  
449 Y<sup>5.58</sup> (Fig. 5B). The highly conserved residue W259<sup>6.48</sup> as a “toggle switch” of G  
450 protein activation showed an anti-clockwise rotation in GPR1-C9 structure (Fig. 5C),  
451 which marks the conformational rearrangement of such a toggle switch upon GPCR  
452 activation (Weis & Kobilka, 2018; Zhou et al., 2019). For the P<sup>5.50</sup>-I/V<sup>3.40</sup>-F<sup>6.44</sup> motif,  
453 rotamer conformational changes was displayed in the GPR1-C9 structure in  
454 compare with the inactive C5aR structure (Fig. 5D). To further identify the structural  
455 basis of different signaling responses of GPR1 and CMKLR1 upon C9 peptide  
456 stimulation, we compared the active structures of the two receptors. An outward  
457 movement of TM5, TM7 and an inward movement of TM6 was demonstrated (Fig.  
458 5E). As for the DRY motif, CMKLR1 presents a DRC in position and R<sup>3.50</sup> formed a  
459 polar interaction with the Y<sup>5.58</sup> residue (Fig. 5F). H135<sup>3.50</sup> in GPR1, however, pointed  
460 to the cytosolic part with no observable polar interaction with adjacent receptor  
461 residues. For the “toggle switch”, W259<sup>6.48</sup> in GPR1 shifted slightly upwards (Fig.  
462 5G). Not much difference in the orientation of the P218<sup>5.50</sup>-V125<sup>3.40</sup>-F255<sup>6.44</sup> motif  
463 was observed (Fig. 5H). Overall, by analyzing the geometry of important motifs for

464 receptor activation, the structure of GPR1 supports GPCR activation and also  
465 explains a lower amplitude of downstream signaling responses.

466

467 Next, the interaction between an activated GPR1 and the Gi class of heterotrimeric  
468 G proteins was examined. In this study, we adopted DNGai1, a dominant negative  
469 form of human Gai1 which has mutations of G203A and A326S, for the decrease  
470 affinity for nucleotide binding and increased stability of heterotrimeric G protein  
471 complex (Lee et al., 1992; Posner et al., 1998). In the structure, the  $\alpha 5$  helix of Gai  
472 inserted into the intracellular loops of GPR1, forming hydrophobic interactions with  
473 F76<sup>2.43</sup>, L151<sup>4.39</sup>, V251<sup>6.40</sup>, Y226<sup>5.58</sup>, T247<sup>6.36</sup>, K310<sup>8.49</sup> (Fig. 6A). Of note, some polar  
474 interactions were expected between  $\alpha 5$  helix G352 and GPR1 H135<sup>3.50</sup>,  $\alpha 5$  helix  
475 N347 and GPR1 H138<sup>3.53</sup>,  $\alpha N$  helix R32 and GPR1 H146<sup>ICL2</sup> (Fig. 6A). Additionally,  
476 we also observed a hydrogen bond between GPR1 helix 8 and D312 of the G $\beta$   
477 subunit (Fig. 6B).

478

479 The interaction between the heterotrimeric Gi protein and the receptor was  
480 compared among other Gi-coupled GPCRs, including active CMKLR1 and CCR5  
481 (PDB ID: 7F1R), inactive C5aR and CXCR4 (PDB ID: 3ODU) (Fig. 6 C-E). The  
482 orientation of TM6 and TM7 marks the greatest difference between active and  
483 inactive receptors (Fig. 6 C and D). For active receptors GPR1, CMKLR1 and CCR5,  
484 TM6 displayed an outward tilt allowing the space for interface between the receptor  
485 and C-terminal  $\alpha 5$  helix of Gai (Fig. 6C). Helix8 of the active receptors showed a  
486 movement to the intracellular compartment for the engagement of G $\beta$  subunit (Fig.  
487 6C). An inward movement of TM7 was also observed for GPR1 and other active  
488 receptors compared with the inactive representatives (Fig. 6D). Despite we did not  
489 observe much polar interaction between GPR1 and the  $\alpha N$  helix of Gai as the case  
490 in CMKLR1 (Wang et al., 2023), the  $\alpha N$  helix of Gai moved upwards for a closer  
491 proximity with the receptor helix8 (Fig. 6E). These features contribute to the  
492 activation of G protein by GPR1.

493

494 We further verified the proposed mechanisms of G protein activation by introducing  
495 point mutations to the key residues. By substituting H135<sup>3.50</sup> into the canonical  
496 arginine, the efficacy of cAMP inhibition increased with a decrease in the potency  
497 (Fig. 7A). And the corresponding curve for G protein dissociation was similar with



498 that of the wild type GPR1 (Fig. 7B). Point mutations of P218<sup>5.50</sup>-V125<sup>3.40</sup>-F255<sup>6.44</sup>  
499 into alanine greatly reduced the cAMP response as well as the G protein dissociation  
500 event (Fig. 7). The “toggle switch” W259<sup>6.48</sup> when substituted by alanine  
501 demonstrated a complete loss in cAMP inhibition, yet the G protein dissociation has  
502 been recovered with a decreased efficacy and potency (Fig. 7 C and F). For the  
503 interaction interface between the receptor and Gai, alanine substitution at H135<sup>3.50</sup>,  
504 H138<sup>3.53</sup> and H146<sup>ICL2</sup> completely diminished G protein responses (Fig. 7 A-B and D-  
505 E). All these function assays verified the importance of aforementioned key residues  
506 in activating G protein responses.

507

508

509

## 510 Discussion

511

512 Chemerin is the natural ligand of CMKLR1, GPR1 and CCRL2. With a pronounced  
513 sequence similarity among these chemerin receptor, C-terminal nonapeptide C9  
514 bearing the YFPGQFAFS sequence is responsible for GPR1 receptor activation and  
515 downstream signaling (De Henau et al., 2016; Fischer et al., 2021; Kennedy &  
516 Davenport, 2018b; Rourke et al., 2015; Schulz et al., 2022). However, despite two  
517 decades of effort since the original characterization of chemerin receptors, the  
518 structural basis for the respective functions and signaling pathways of the three  
519 chemerin receptors remain unclear. Although several studies implied a possible Gi  
520 coupling by GPR1, some other studies demonstrated an absence of G protein  
521 signaling event, thereby distinguishing GPR1 from CMKLR1 with full signaling  
522 capability. In this study, we report a cryo-EM structure of human GPR1-C9-Gi protein  
523 complex, providing structural evidence that GPR1 is able to couple to the Gi  
524 proteins. Examination into the structure and molecular dynamics of the ligand  
525 binding pocket revealed a shallower binding of C9 to GPR1 than CMKLR1. The  
526 analysis of the receptor-Gi protein interface found some polar interactions between  
527 the receptor and G protein heterodimer complex. Of note, the highly G protein-  
528 binding motif, D<sup>3.49</sup>-R<sup>3.50</sup>-Y<sup>3.51</sup>, found in many Class A GPCRs, is replaced by DHY in  
529 GPR1. Notably, histamine substitution in this motif did not diminish G protein binding,  
530 and a polar interaction between H135<sup>3.50</sup> and  $\alpha 5$  helix of Gi was even observed.  
531 Likewise, replacing the histamine residue with the original arginine residue did not  
532 significantly alter Gi protein coupling and downstream signaling. Altogether, our  
533 findings support GPR1 coupling to the Gi proteins.

534

535 It has been widely accepted that the GPR1 is generally weaker than its structural  
536 analog CMKLR1 in terms of the magnitude of its ligand binding and downstream  
537 signaling responses (De Henau et al., 2016; Degroot et al., 2022; Kennedy &  
538 Davenport, 2018a; Kennedy et al., 2016; Rourke et al., 2015; Rourke et al., 2014).  
539 Our structural and functional findings are consistent with those previous findings. By  
540 mapping into the structural details of the binding pocket, a shallower pocket for  
541 ligand insertion was observed in comparison to the one in CMKLR1 (Fig. S3). There  
542 are fewer C9 contact sites in the GPR1 binding pocket than in CMKLR1, thus  
543 affecting the extent of conformational changes necessary for full activation of the

544 receptor. Interestingly, the molecular dynamics trajectories of receptor-ligand  
545 interaction shows that the first 3 hydrogen bond-forming residues in the receptor fall  
546 into the same side of the ligand binding pocket (TM2, 3, 4), whereas the rest of these  
547 residues fall in the other side of the binding pocket, forming a major sub-pocket and  
548 a minor sub-pocket. Moreover, the majority of receptor residues with hydrophobic  
549 interactions are clustered around TM2 and TM7 (Fig. S5). This observation is similar  
550 to the division of major and minor sub-pockets in chemokine receptors, where the  
551 TM3-7 of chemokine receptors build the major sub-pocket and TM1-3 and TM7  
552 identify the minor sub-pocket for chemokine binding (Kleist et al., 2016; Surgand et  
553 al., 2006). This feature of the ligand binding pocket may further our understanding of  
554 the similarities and differences between chemerin receptors and chemokine  
555 receptors.

556

557 While the structural information of GPR1 expands our knowledge in chemerin  
558 receptor biology, several unknowns still remain for further investigation. Given the  
559 high similarities between GPR1 and CMKLR1, they may share a variety of agonists  
560 and antagonists. Currently the only natural ligand of GPR1 and CMKLR1 is  
561 chemerin, and the wide distribution of GPR1 and CMKLR1 among immune cells,  
562 adipose tissues and central nervous system suggests the presence of other possible  
563 endogenous ligands (Herova et al., 2015; Marchese et al., 1994; Tokizawa et al.,  
564 2000; Wittamer et al., 2003; Wittamer et al., 2004). Indeed, a previous report  
565 unraveled a novel ligand of GPR1, FAM19A1, which is highly expressed in adult  
566 hippocampus and has neural modulatory effect (Zheng et al., 2018). However, there  
567 is still a lack of structural information about FAM19A1 interaction with GPR1, and the  
568 reported study was based primarily on animal experiments without a biochemical  
569 mechanism for receptor activation. Taken together, the cryo-EM structure of C9-  
570 bound GPR1-Gi complex structure provides valuable information for identification of  
571 signaling properties of chemerin receptors. The activation of GPR1 incorporates the  
572 coupling of Gi protein and its downstream signaling events, despite a less robust G  
573 protein response when compared with CMKLR1. These findings support a role for  
574 GPR1 in Gi protein activation, and point future research directions including the  
575 expression profile of these chemerin receptors in different tissues and organs, cross-  
576 desensitization of these receptors, and possible biased signaling through these  
577 receptors when more ligands become available.

578

579 **Acknowledgments**

580 This work was supported in part by grants from the Science, Technology and  
581 Innovation Commission of Shenzhen Municipality GXWD20201231105722002-  
582 20200831175432002 (R.D.Y., Y.D. and L.Z.), JCYJ20200109150019113 (Y.D.,  
583 G.C.), JCYJ20200109150003938 (L.Z.), RCYX20200714114645019 (L.Z.) and  
584 RCBS20221008093330067 (A.L.). This work was also supported by National Natural  
585 Science Foundation of China 31971179 (L.Z.) and 32070950 (R.D.Y.), the  
586 Fellowship of China Postdoctoral Science Foundation 2022M713049 (A.L.) and  
587 2021M703092 (J. W.), the Ganghong Young Scholar Development Fund (R.D.Y.),  
588 the Kobilka Institute of Innovative Drug Discovery at The Chinese University of Hong  
589 Kong, Shenzhen (Y.D., R.D.Y.). The authors thank the Kobilka Cryo-Electron  
590 Microscopy Center in the Chinese University of Hong Kong, Shenzhen for cryo-  
591 electron microscopy analysis. The computational work was supported by the  
592 Warshel Institute for Computational Biology (funding from Shenzhen City and  
593 Longgang District) and the fund from Shenzhen-Hong Kong Cooperation Zone for  
594 Technology and Innovation (HZQB-KCZYB-2020056).

595 **Author Contributions:**

596 A.L. performed cloning, protein expression and purification of the human GPR1  
597 protein for complex formation, screening of cryo-EM grids, collection of cryo-EM data  
598 and building of the structural model; Y.L. conducted mutagenesis analysis, functional  
599 assays, structural comparison and figure preparation; G.C. assisted in structural  
600 model building; W.L. and L.Z. performed MD simulation; J.W. and F.Y. provided  
601 purified G proteins and Nano-BiT constructs used in this study; Y.D. and R.D.Y.  
602 designed and supervised the research; Y.L. and R.D.Y. wrote the manuscript.

603 **Competing Interest Statement:**

604 The authors declare no competing interest.

605

606

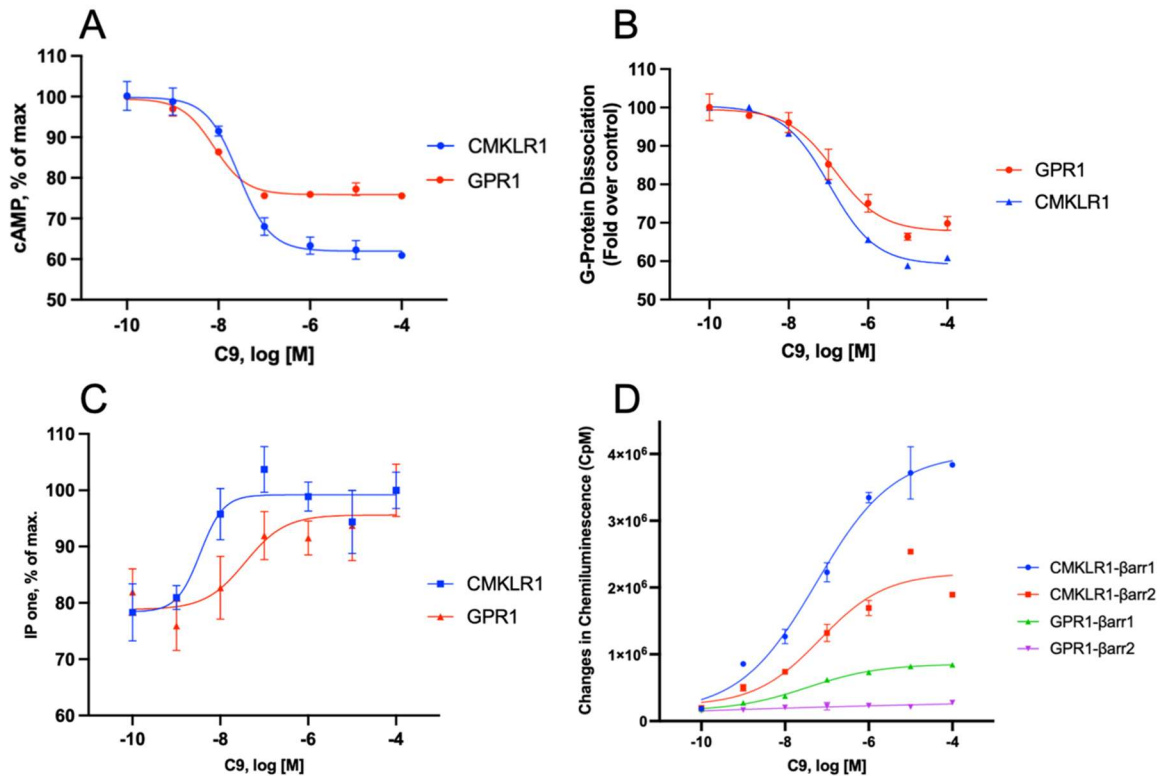

607  
608  
609  
610  
611  
612  
613  
614  
615  
616  
617  
618  
619

**Figure 1. cAMP inhibition, G protein dissociation, IP one and  $\beta$ -arrestin responses of GPR1. (A)** cAMP inhibition response of GPR1 and CMKLR1 stimulated by different concentrations of C9. **(B)** NanoBiT G protein dissociation response of GPR1 and CMKLR1 treated by different concentrations of C9. **(C)** Accumulation of IP-one upon treatment of different concentrations of C9 on GPR1 and CMKLR1. **(D)** NanoBiT  $\beta$ -arrestin recruitment of GPR1 and CMKLR1 upon stimulation of different concentration of C9. Data are shown as means  $\pm$  SEM from three independent experiments.

620

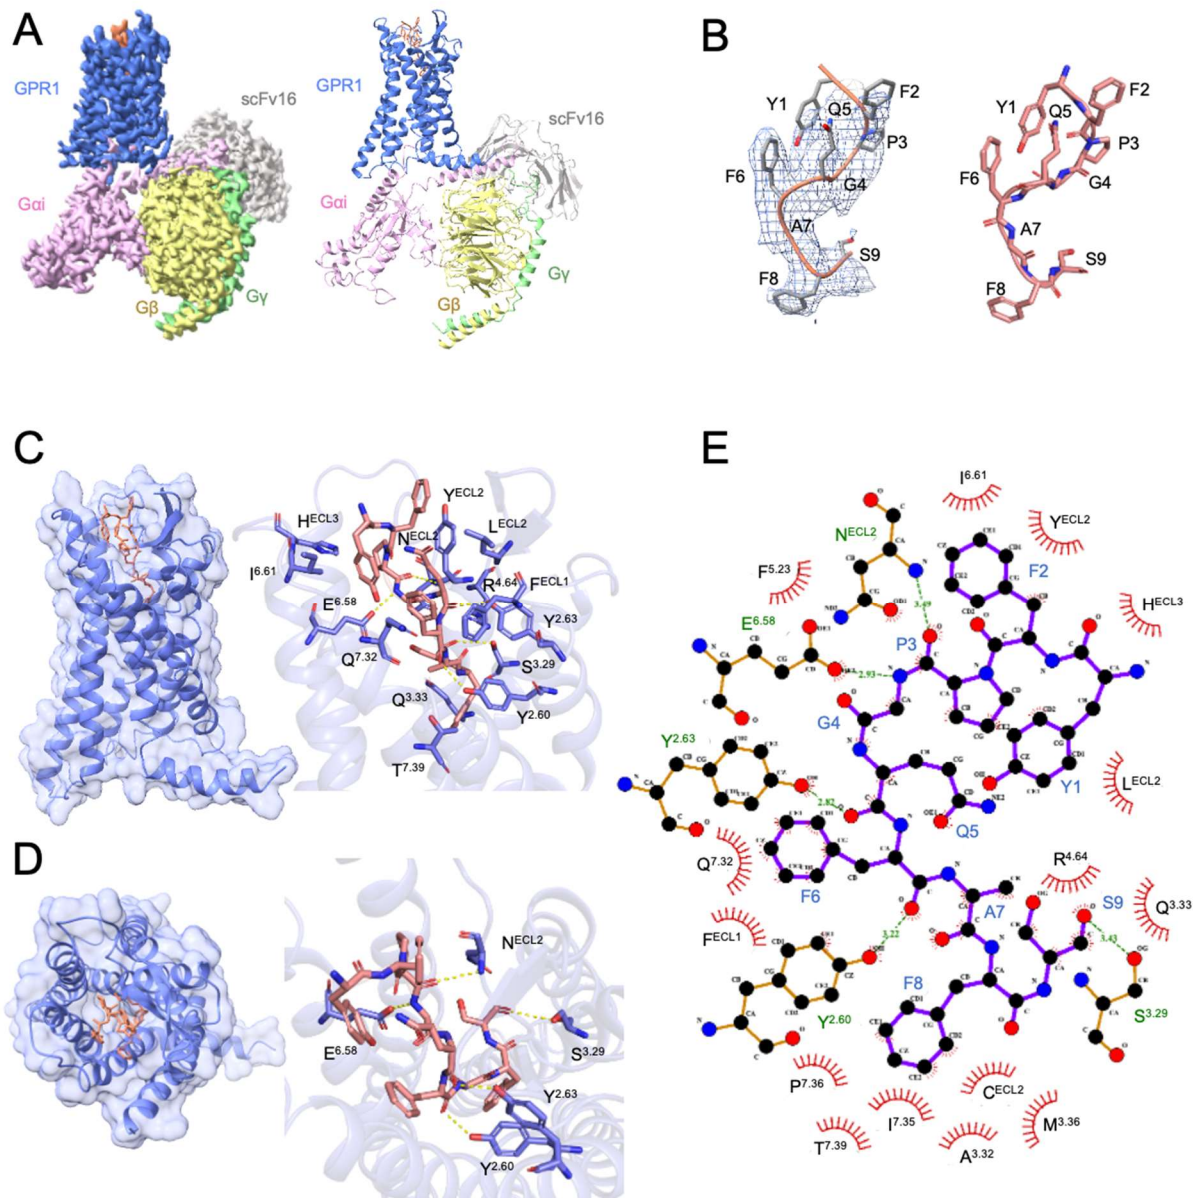

621

622

623

624

625

626

627

628

629

630

631

632

633

634

635

636

637

**Figure 2. Overall structure and ligand binding pocket of C9-GPR1-Gi complex.**

(A) Cryo-EM density map (left) and the structural model (right) of the GPR1-Gi-scFv16 complex bound to C9. (B) Cryo-EM density map (left) and the peptide backbone (right) of C9. (C) Overall structure of GPR1-C9 complex from side view (left) and key interaction residues (right). In the overall structure, the receptor (marine blue) is shown in cartoon and surface representation. The C9 peptide (salmon orange) is shown in sticks with carbon in salmon orange. The residues of GPR1 within 4 Å from the C9 peptide (salmon orange licorice and ribbon) are shown in marine blue licorice. The hydrogen bonds are displayed as dashed lines. (D) Extracellular view of the overall structure (left) and polar interactions (right) of the GPR1-C9 complex. The residue numbering of GPR1 follows the Ballesteros–Weinstein nomenclature. (E) Schematic representation of interactions between GPR1 and C9 analyzed by LigPlot+ program. The stick representations of GPR1 and C9 are shown as orange and purple sticks, respectively.



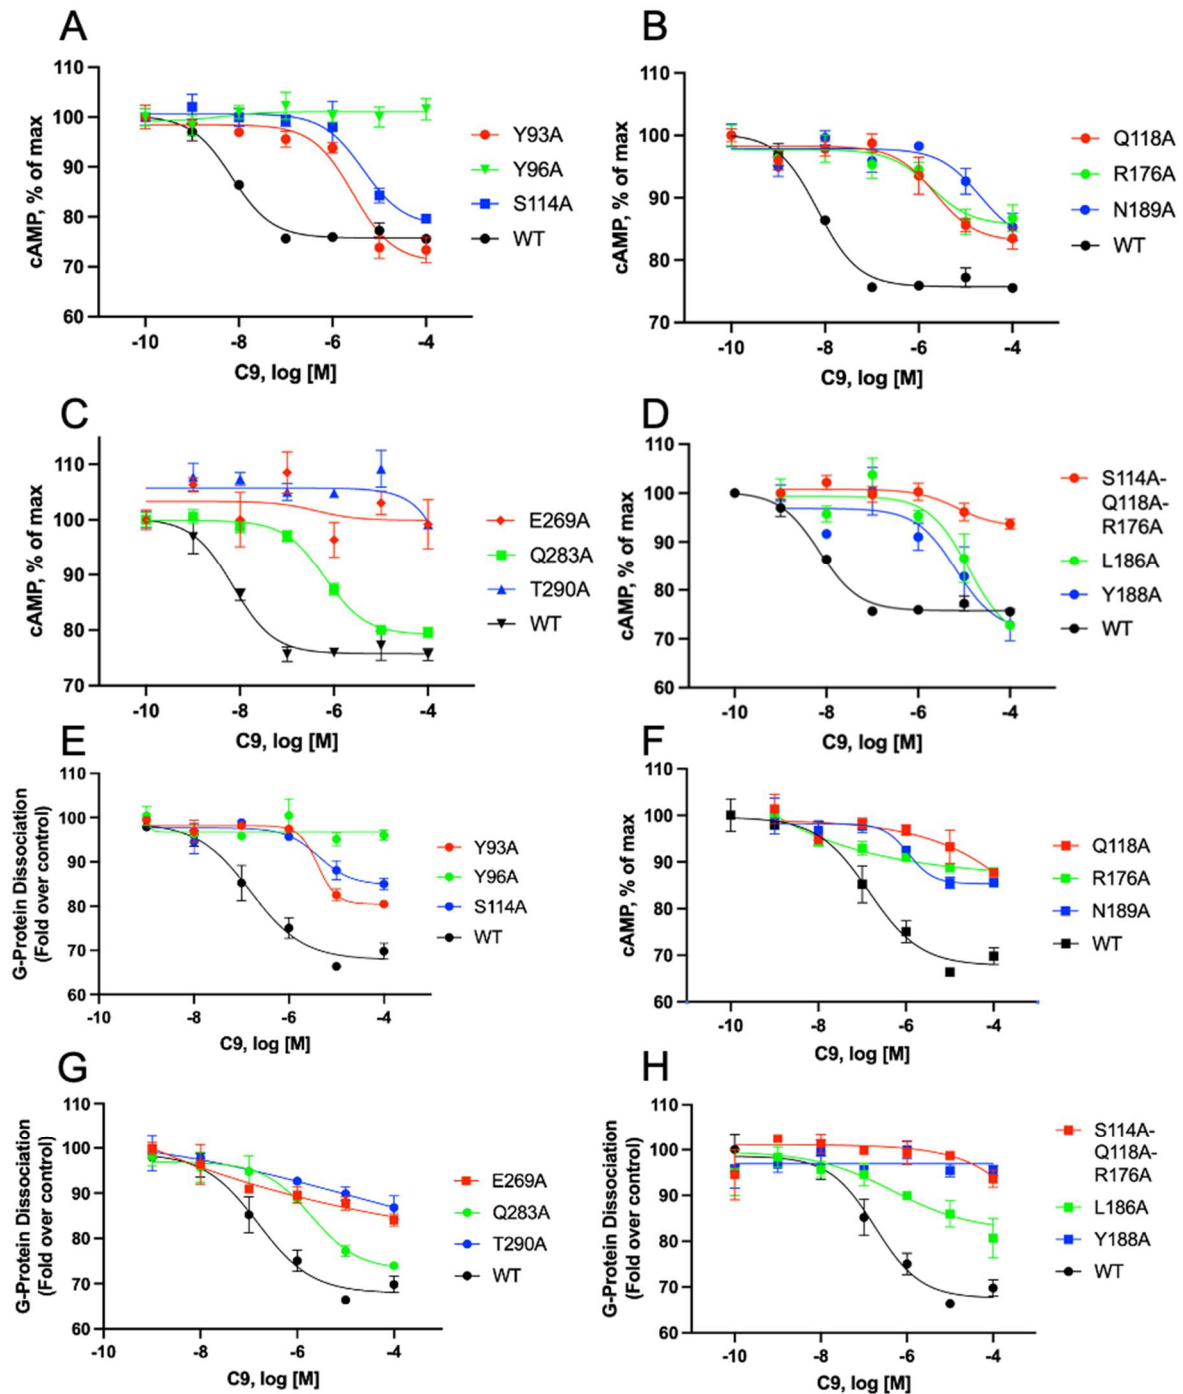

638  
639  
640  
641  
642  
643  
644  
645  
646  
647

**Figure 3. Structural mutants of C9-GPR1 binding pocket affect ligand-induced cAMP inhibition and G protein dissociation. (A - D)** cAMP response in HeLa cells transfected to express WT or mutant GPR1. Different concentrations of C9 are applied. **(E - H)** G protein dissociation in HEK293T cells co-transfected to express WT or mutant GPR1, Gai1-LgBiT, Gβ1, and SmBiT-Gy2. Different concentrations of C9 are applied. All data shown are means ± SEM from three independent experiments.

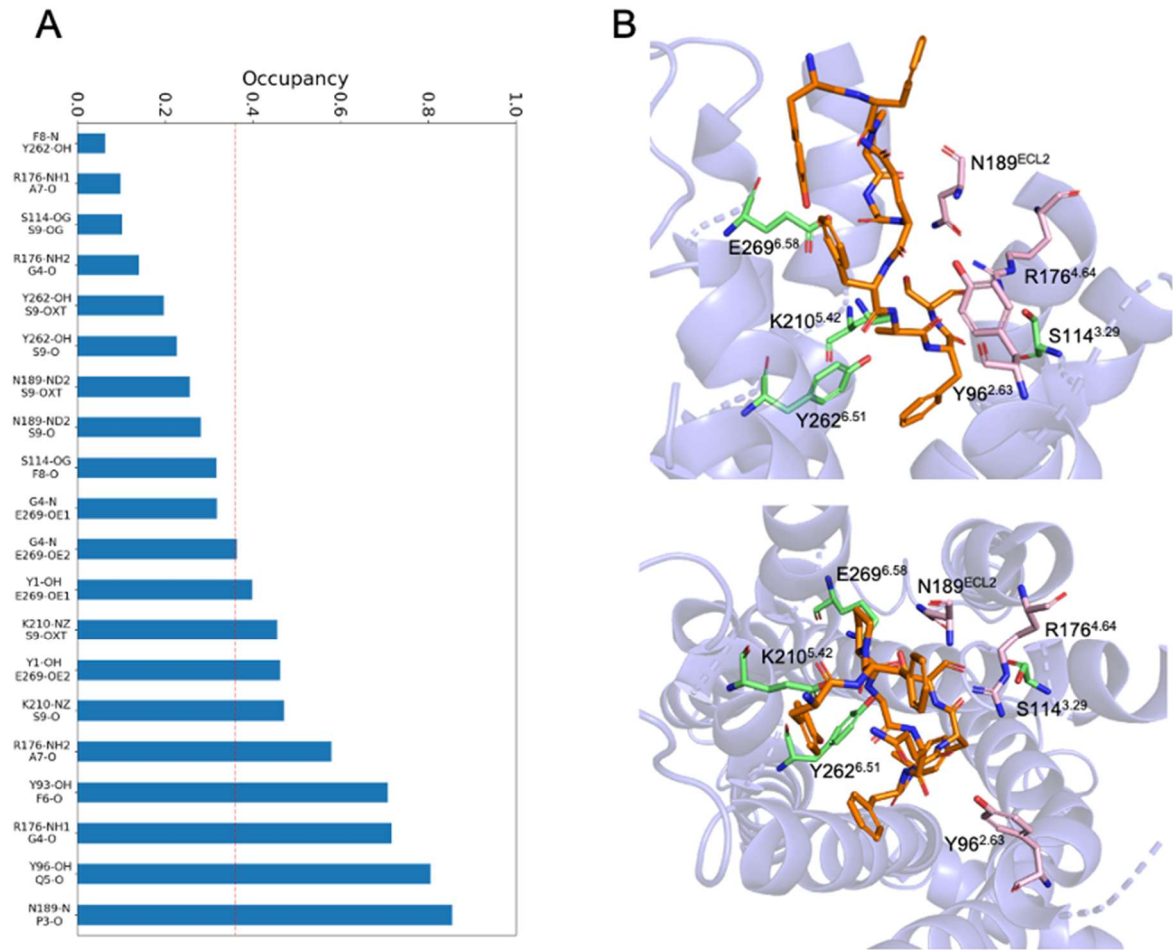

648

649

650

651

652

653

654

**Figure 4. Thermodynamic stability analysis of the GPR1-C9 interface with  $\mu$ -scale MD simulations. (A) The occupancy of all H-bonds between C9 and GPR1 observed in MD simulations. (B) Side view (upper panel) and top view (lower panel) of the distributions of functionally related residues around the C9 peptide.**

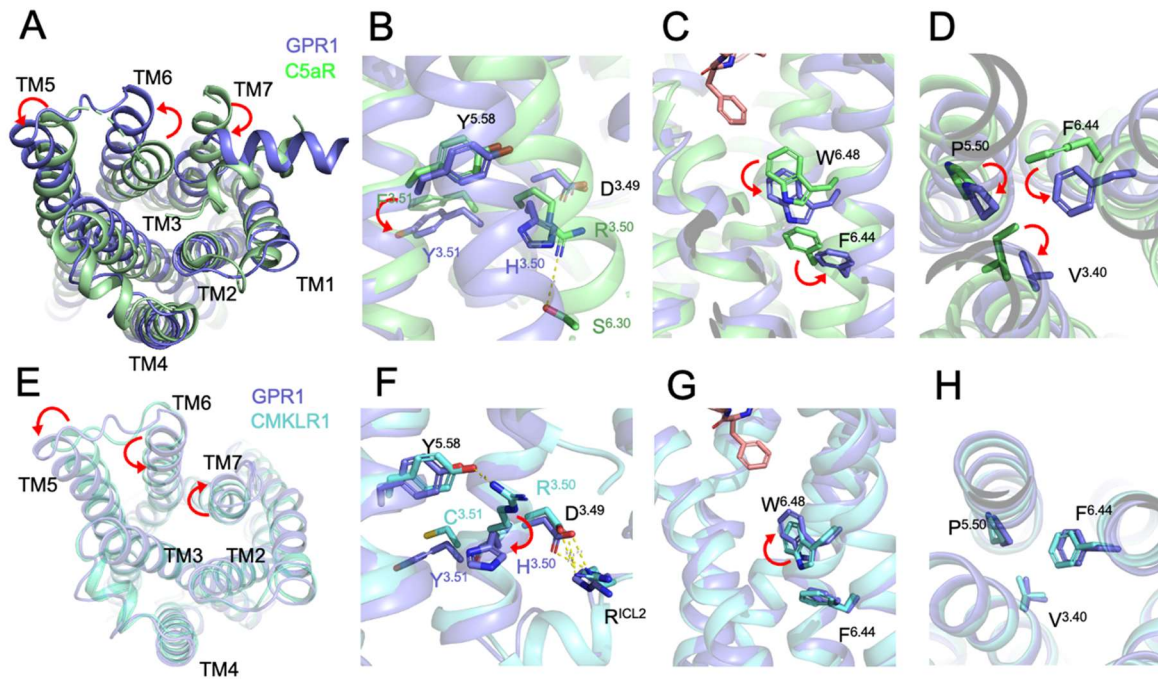

655  
656  
657  
658  
659  
660  
661  
662  
663  
664  
665  
666  
667  
668  
669  
670  
671  
672  
673

**Figure 5. Comparison of GPCR structural motifs for G protein activation. (A)** Intracellular view of the movement of GPR1 transmembrane helix 5, 6, and 7 (shown in marine blue) in comparison with inactive C5aR (PDB ID: 6C1R, shown in lime green). **(B)** Side close-up view of the D<sup>3.49</sup>-R<sup>3.50</sup>-Y<sup>3.51</sup> motif. A downward movement of Y<sup>3.51</sup> of GPR1 is highlighted by a red arrow. **(C)** Side close-up view of the “toggle switch”, W<sup>6.48</sup> and F<sup>6.44</sup>, an anti-clockwise rotation is highlighted for GPR1. **(D)** Rotamer conformational changes at the P<sup>5.50</sup>-I/V<sup>3.40</sup>-F<sup>6.44</sup> motif of GPR1 and C5aR, respectively. **(E)** Intracellular view of the movement of GPR1 transmembrane helix 5, 6, and 7 (shown in marine blue) in comparison with active CMKLR1 (PDB ID: 7YKD, shown in cyan). **(F)** Side close-up view of the D<sup>3.49</sup>-R<sup>3.50</sup>-Y<sup>3.51</sup> motif. A downward movement of H<sup>3.50</sup> of GPR1 is highlighted by a red arrow. **(G)** Side close-up view of the “toggle switch”, W<sup>6.48</sup> and F<sup>6.44</sup>, a clockwise rotation is highlighted for GPR1. **(H)** No significant conformational change at P<sup>5.50</sup>-I/V<sup>3.40</sup>-F<sup>6.44</sup> motif of GPR1 and CMKLR1, respectively.

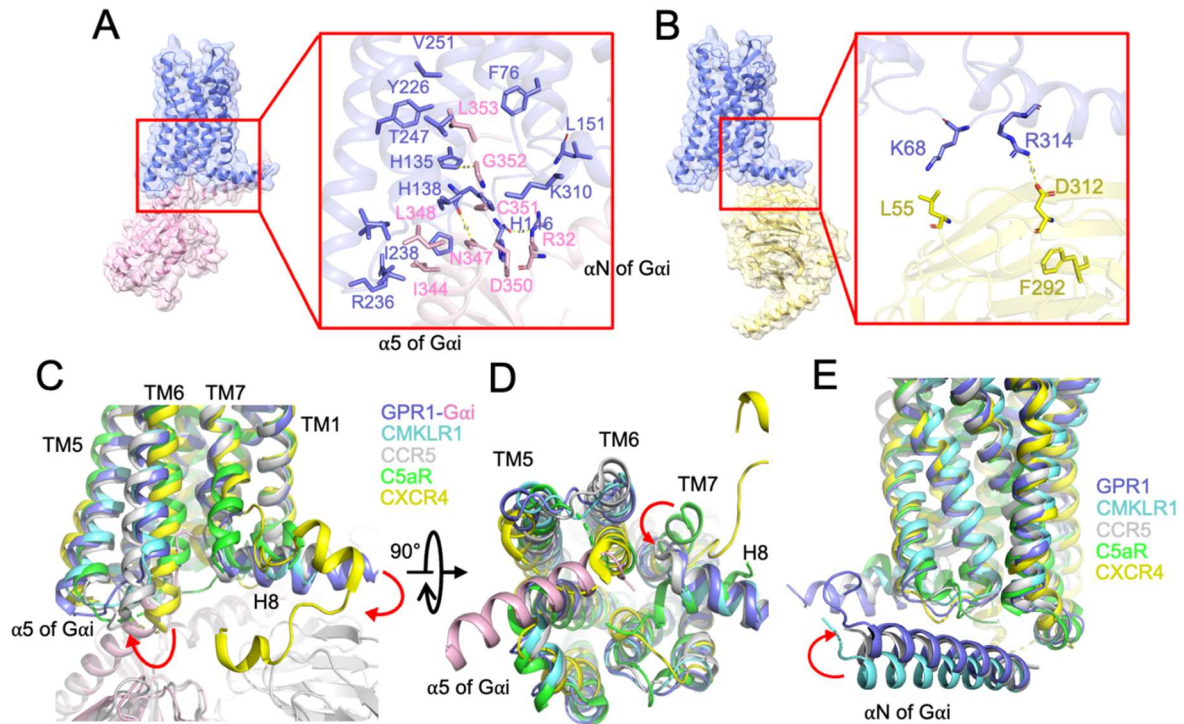

674  
675  
676  
677  
678  
679  
680  
681  
682  
683  
684  
685  
686

**Figure 6. G protein interface of the C9-bound GPR1-Gi complex. (A)** The interactions between the  $\alpha 5$  helix of  $G\alpha i$  (pink) and GPR1 (marine blue) in the cavity at ICL3, TM5, TM6, and TM7 regions. **(B)** The interactions between  $G\beta$  subunit (yellow) and H8 of the receptor (marine blue). **(C)** Comparisons of the interactions between the  $\alpha 5$  helix of  $G\alpha i$  and TM5, TM6, and ICL3 of several  $G_i$ -coupled receptors including GPR1 (marine blue), CMKLR1 (cyan, PDB ID: 7YKD), CCR5 (gray, PDB ID: 7F1R), C5aR (lime green, PDB ID: 6C1R) and CXCR4 (yellow, PDB ID: 3ODU). **(D)**  $90^\circ$  orientation of (C) for intracellular view showing the locations of ICL2, ICL1, and H8. **(E)** Same as (C) and (D) yet the interactions of the  $\alpha N$  helix of  $G\alpha i$  with these receptors are compared.



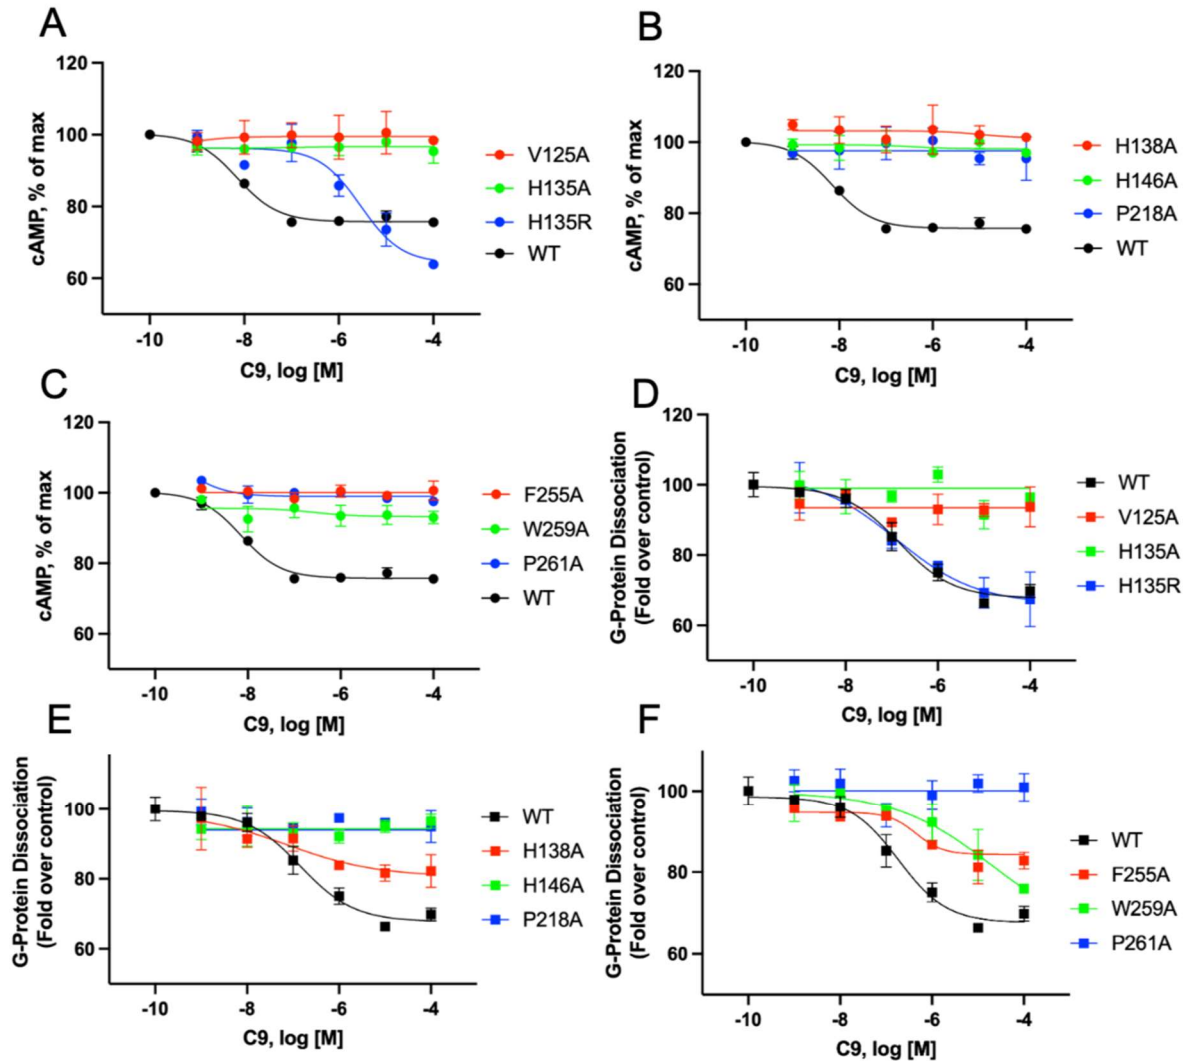

687  
688  
689  
690  
691  
692  
693  
694  
695  
696  
697

**Figure 7. Point mutations at key residues for G protein activation affect cAMP inhibition and G protein dissociation. (A - C) cAMP response in HeLa cells transfected to express WT or mutant GPR1. Different concentrations of C9 are applied. (D - F) G protein dissociation in HEK293T cells co-transfected to express WT or mutant GPR1, Gai1-LgBiT, Gβ1, and SmBiT-Gγ2. Different concentrations of C9 are applied. All data shown are means ± SEM from three independent experiments.**

750 **References:**

- 751 Anandakrishnan, R., Aguilar, B., & Onufriev, A. V. (2012). H++ 3.0: automating pK prediction  
752 and the preparation of biomolecular structures for atomistic molecular modeling and  
753 simulations. *Nucleic Acids Res*, 40(Web Server issue), W537-541.  
754 <https://doi.org/10.1093/nar/gks375>
- 755 Ballesteros, J. A., & Weinstein, H. (1995). Integrated methods for the construction of three-  
756 dimensional models and computational probing of structure-function relations in G  
757 protein-coupled receptors. In *Methods in neurosciences* (Vol. 25, pp. 366-428).  
758 Elsevier.
- 759 Barnea, G., Strapps, W., Herrada, G., Berman, Y., Ong, J., Kloss, B., Axel, R., & Lee, K. J.  
760 (2008). The genetic design of signaling cascades to record receptor activation. *Proc*  
761 *Natl Acad Sci U S A*, 105(1), 64-69. <https://doi.org/10.1073/pnas.0710487105>
- 762 Bozaoglu, K., Bolton, K., McMillan, J., Zimmet, P., Jowett, J., Collier, G., Walder, K., &  
763 Segal, D. (2007). Chemerin is a novel adipokine associated with obesity and  
764 metabolic syndrome. *Endocrinology*, 148(10), 4687-4694.  
765 <https://doi.org/10.1210/en.2007-0175>
- 766 Caulfield, M., Munroe, P., Pembroke, J., Samani, N., Dominiczak, A., Brown, M., Benjamin,  
767 N., Webster, J., Ratcliffe, P., O'Shea, S., Papp, J., Taylor, E., Dobson, R., Knight, J.,  
768 Newhouse, S., Hooper, J., Lee, W., Brain, N., Clayton, D., . . . Study, M. R. C. B. G.  
769 o. H. (2003). Genome-wide mapping of human loci for essential hypertension.  
770 *Lancet*, 361(9375), 2118-2123. [https://doi.org/10.1016/S0140-6736\(03\)13722-1](https://doi.org/10.1016/S0140-6736(03)13722-1)
- 771 Chen, G., Wang, X., Liao, Q., Ge, Y., Jiao, H., Chen, Q., Liu, Y., Lyu, W., Zhu, L., van  
772 Zundert, G. C. P., Robertson, M. J., Skiniotis, G., Du, Y., Hu, H., & Ye, R. D. (2022).  
773 Structural basis for recognition of N-formyl peptides as pathogen-associated  
774 molecular patterns. *Nat Commun*, 13(1), 5232. <https://doi.org/10.1038/s41467-022-32822-y>
- 775  
776 Chen, T., Xiong, M., Zong, X., Ge, Y., Zhang, H., Wang, M., Won Han, G., Yi, C., Ma, L., Ye,  
777 R. D., Xu, Y., Zhao, Q., & Wu, B. (2020). Structural basis of ligand binding modes at  
778 the human formyl peptide receptor 2. *Nat Commun*, 11(1), 1208.  
779 <https://doi.org/10.1038/s41467-020-15009-1>
- 780 Chun, E., Thompson, A. A., Liu, W., Roth, C. B., Griffith, M. T., Katritch, V., Kunken, J., Xu,  
781 F., Cherezov, V., Hanson, M. A., & Stevens, R. C. (2012). Fusion partner toolchest  
782 for the stabilization and crystallization of G protein-coupled receptors. *Structure*,  
783 20(6), 967-976. <https://doi.org/10.1016/j.str.2012.04.010>
- 784 De Henau, O., Degroot, G. N., Imbault, V., Robert, V., De Poorter, C., McHeik, S., Gales, C.,  
785 Parmentier, M., & Springael, J. Y. (2016). Signaling Properties of Chemerin  
786 Receptors CMKLR1, GPR1 and CCRL2. *PLoS One*, 11(10), e0164179.  
787 <https://doi.org/10.1371/journal.pone.0164179>
- 788 Degroot, G. N., Lepage, V., Parmentier, M., & Springael, J. Y. (2022). The Atypical  
789 Chemerin Receptor GPR1 Displays Different Modes of Interaction with beta-Arrestins  
790 in Humans and Mice with Important Consequences on Subcellular Localization and  
791 Trafficking. *Cells*, 11(6). <https://doi.org/10.3390/cells11061037>
- 792 Ernst, M. C., & Sinal, C. J. (2010). Chemerin: at the crossroads of inflammation and obesity.  
793 *Trends Endocrinol Metab*, 21(11), 660-667. <https://doi.org/10.1016/j.tem.2010.08.001>
- 794 Fischer, T. F., Czerniak, A. S., Weiß, T., Schoeder, C. T., Wolf, P., Seitz, O., Meiler, J., &  
795 Beck-Sickinger, A. G. (2021). Ligand-binding and -scavenging of the chemerin  
796 receptor GPR1. *Cellular and Molecular Life Sciences*, 78(17-18), 6265-6281.  
797 <https://doi.org/10.1007/s00018-021-03894-8>
- 798 Goralski, K. B., Jackson, A. E., McKeown, B. T., & Sinal, C. J. (2019). More Than an  
799 Adipokine: The Complex Roles of Chemerin Signaling in Cancer. *Int J Mol Sci*,  
800 20(19). <https://doi.org/10.3390/ijms20194778>
- 801 Goralski, K. B., McCarthy, T. C., Hanniman, E. A., Zabel, B. A., Butcher, E. C., Parlee, S. D.,  
802 Muruganandan, S., & Sinal, C. J. (2007). Chemerin, a novel adipokine that regulates



- 803 adipogenesis and adipocyte metabolism. *J Biol Chem*, 282(38), 28175-28188.  
804 <https://doi.org/10.1074/jbc.M700793200>
- 805 Helfer, G., & Wu, Q. F. (2018). Chemerin: a multifaceted adipokine involved in metabolic  
806 disorders. *J Endocrinol*, 238(2), R79-R94. <https://doi.org/10.1530/JOE-18-0174>
- 807 Herova, M., Schmid, M., Gemperle, C., & Hersberger, M. (2015). ChemR23, the receptor for  
808 chemerin and resolvin E1, is expressed and functional on M1 but not on M2  
809 macrophages. *J Immunol*, 194(5), 2330-2337.  
810 <https://doi.org/10.4049/jimmunol.1402166>
- 811 Huang, J., Rauscher, S., Nawrocki, G., Ran, T., Feig, M., de Groot, B. L., Grubmuller, H., &  
812 MacKerell, A. D., Jr. (2017). CHARMM36m: an improved force field for folded and  
813 intrinsically disordered proteins. *Nat Methods*, 14(1), 71-73.  
814 <https://doi.org/10.1038/nmeth.4067>
- 815 Inoue, A., Raimondi, F., Kadji, F. M. N., Singh, G., Kishi, T., Uwamizu, A., Ono, Y., Shinjo,  
816 Y., Ishida, S., Arang, N., Kawakami, K., Gutkind, J. S., Aoki, J., & Russell, R. B.  
817 (2019). Illuminating G-Protein-Coupling Selectivity of GPCRs. *Cell*, 177(7), 1933-  
818 1947 e1925. <https://doi.org/10.1016/j.cell.2019.04.044>
- 819 Karagiannis, G. S., Weile, J., Bader, G. D., & Minta, J. (2013). Integrative pathway dissection  
820 of molecular mechanisms of moxLDL-induced vascular smooth muscle phenotype  
821 transformation. *BMC Cardiovasc Disord*, 13, 4. <https://doi.org/10.1186/1471-2261-13-4>
- 822
- 823 Kennedy, A. J., & Davenport, A. P. (2018a). International Union of Basic and Clinical  
824 Pharmacology CIII: Chemerin Receptors CMKLR1 (Chemerin1) and GPR1  
825 (Chemerin2) Nomenclature, Pharmacology, and Function. *Pharmacol Rev*, 70(1),  
826 174-196. <https://doi.org/10.1124/pr.116.013177>
- 827 Kennedy, A. J., & Davenport, A. P. (2018b). International Union of Basic and Clinical  
828 Pharmacology CIII: Chemerin Receptors CMKLR1 (Chemerin(1)) and GPR1  
829 (Chemerin(2)) Nomenclature, Pharmacology, and Function. *Pharmacol Rev*, 70(1),  
830 174-196. <https://doi.org/10.1124/pr.116.013177>
- 831 Kennedy, A. J., Yang, P., Read, C., Kuc, R. E., Yang, L., Taylor, E. J., Taylor, C. W.,  
832 Maguire, J. J., & Davenport, A. P. (2016). Chemerin Elicits Potent Constrictor Actions  
833 via Chemokine-Like Receptor 1 (CMKLR1), not G-Protein-Coupled Receptor 1  
834 (GPR1), in Human and Rat Vasculature. *J Am Heart Assoc*, 5(10).  
835 <https://doi.org/10.1161/JAHA.116.004421>
- 836 Kleist, A. B., Getschman, A. E., Ziarek, J. J., Nevins, A. M., Gauthier, P. A., Chevigne, A.,  
837 Szpakowska, M., & Volkman, B. F. (2016). New paradigms in chemokine receptor  
838 signal transduction: Moving beyond the two-site model. *Biochem Pharmacol*, 114,  
839 53-68. <https://doi.org/10.1016/j.bcp.2016.04.007>
- 840 Lee, E., Taussig, R., & Gilman, A. G. (1992). The G226A mutant of Gs alpha highlights the  
841 requirement for dissociation of G protein subunits. *J Biol Chem*, 267(2), 1212-1218.  
842 <https://www.ncbi.nlm.nih.gov/pubmed/1730644>
- 843 Lehrke, M., Becker, A., Greif, M., Stark, R., Laubender, R. P., von Ziegler, F., Leberherz, C.,  
844 Tittus, J., Reiser, M., Becker, C., Goke, B., Leber, A. W., Parhofer, K. G., & Broedl,  
845 U. C. (2009). Chemerin is associated with markers of inflammation and components  
846 of the metabolic syndrome but does not predict coronary atherosclerosis. *Eur J*  
847 *Endocrinol*, 161(2), 339-344. <https://doi.org/10.1530/EJE-09-0380>
- 848 Maeda, S., Koehl, A., Matile, H., Hu, H., Hilger, D., Schertler, G. F. X., Manglik, A., Skiniotis,  
849 G., Dawson, R. J. P., & Kobilka, B. K. (2018). Development of an antibody fragment  
850 that stabilizes GPCR/G-protein complexes. *Nat Commun*, 9(1), 3712.  
851 <https://doi.org/10.1038/s41467-018-06002-w>
- 852 Marchese, A., Docherty, J. M., Nguyen, T., Heiber, M., Cheng, R., Heng, H. H., Tsui, L. C.,  
853 Shi, X., George, S. R., & O'Dowd, B. F. (1994). Cloning of human genes encoding  
854 novel G protein-coupled receptors. *Genomics*, 23(3), 609-618.  
855 <https://doi.org/10.1006/geno.1994.1549>
- 856 Meder, W., Wendland, M., Busmann, A., Kutzleb, C., Spodsberg, N., John, H., Richter, R.,  
857 Schleuder, D., Meyer, M., & Forssmann, W. G. (2003). Characterization of human

- 858 circulating TIG2 as a ligand for the orphan receptor ChemR23. *FEBS Lett*, 555(3),  
859 495-499. [https://doi.org/10.1016/s0014-5793\(03\)01312-7](https://doi.org/10.1016/s0014-5793(03)01312-7)
- 860 Neves, K. B., Nguyen Dinh Cat, A., Alves-Lopes, R., Harvey, K. Y., Costa, R. M. D., Lobato,  
861 N. S., Montezano, A. C., Oliveira, A. M., Touyz, R. M., & Tostes, R. C. (2018).  
862 Chemerin receptor blockade improves vascular function in diabetic obese mice via  
863 redox-sensitive and Akt-dependent pathways. *Am J Physiol Heart Circ Physiol*,  
864 315(6), H1851-H1860. <https://doi.org/10.1152/ajpheart.00285.2018>
- 865 Posner, B. A., Mixon, M. B., Wall, M. A., Sprang, S. R., & Gilman, A. G. (1998). The A326S  
866 mutant of Gα1 as an approximation of the receptor-bound state. *J Biol Chem*,  
867 273(34), 21752-21758. <https://doi.org/10.1074/jbc.273.34.21752>
- 868 Rourke, J. L., Dranse, H. J., & Sinal, C. J. (2015). CMKLR1 and GPR1 mediate chemerin  
869 signaling through the RhoA/ROCK pathway. *Mol Cell Endocrinol*, 417, 36-51.  
870 <https://doi.org/10.1016/j.mce.2015.09.002>
- 871 Rourke, J. L., Muruganandan, S., Dranse, H. J., McMullen, N. M., & Sinal, C. J. (2014). Gpr1  
872 is an active chemerin receptor influencing glucose homeostasis in obese mice. *J*  
873 *Endocrinol*, 222(2), 201-215. <https://doi.org/10.1530/JOE-14-0069>
- 874 Samson, M., Edinger, A. L., Stordeur, P., Rucker, J., Verhasselt, V., Sharron, M., Govaerts,  
875 C., Mollereau, C., Vassart, G., Doms, R. W., & Parmentier, M. (1998). ChemR23, a  
876 putative chemoattractant receptor, is expressed in monocyte-derived dendritic cells  
877 and macrophages and is a coreceptor for SIV and some primary HIV-1 strains. *Eur J*  
878 *Immunol*, 28(5), 1689-1700. [https://doi.org/10.1002/\(SICI\)1521-4141\(199805\)28:05<1689::AID-IMMU1689>3.0.CO;2-I](https://doi.org/10.1002/(SICI)1521-4141(199805)28:05<1689::AID-IMMU1689>3.0.CO;2-I)
- 880 Schulz, R., Korkut-Demirbas, M., Venturino, A., Colombo, G., & Siegert, S. (2022). Chimeric  
881 GPCRs mimic distinct signaling pathways and modulate microglia responses. *Nat*  
882 *Commun*, 13(1), 4728. <https://doi.org/10.1038/s41467-022-32390-1>
- 883 Shimizu, N., Tanaka, A., Oue, A., Mori, T., Ohtsuki, T., Apichartpiyakul, C., Uchiumi, H.,  
884 Nojima, Y., & Hoshino, H. (2009). Broad usage spectrum of G protein-coupled  
885 receptors as coreceptors by primary isolates of HIV. *AIDS*, 23(7), 761-769.  
886 <https://doi.org/10.1097/QAD.0b013e328326cc0d>
- 887 Surgand, J. S., Rodrigo, J., Kellenberger, E., & Rognan, D. (2006). A chemogenomic  
888 analysis of the transmembrane binding cavity of human G-protein-coupled receptors.  
889 *Proteins*, 62(2), 509-538. <https://doi.org/10.1002/prot.20768>
- 890 Tokizawa, S., Shimizu, N., Hui-Yu, L., Deyu, F., Haraguchi, Y., Oite, T., & Hoshino, H.  
891 (2000). Infection of mesangial cells with HIV and SIV: identification of GPR1 as a  
892 coreceptor. *Kidney Int*, 58(2), 607-617. <https://doi.org/10.1046/j.1523-1755.2000.00207.x>
- 894 Wang, J., Chen, G., Liao, Q., Lyu, W., Liu, A., Zhu, L., Du, Y., & Ye, R. D. (2023). Cryo-EM  
895 structure of the human chemerin receptor 1-Gi protein complex bound to the C-  
896 terminal nonapeptide of chemerin. *Proc Natl Acad Sci U S A*, 120(11), e2214324120.  
897 <https://doi.org/10.1073/pnas.2214324120>
- 898 Weis, W. I., & Kobilka, B. K. (2018). The Molecular Basis of G Protein-Coupled Receptor  
899 Activation. *Annu Rev Biochem*, 87, 897-919. <https://doi.org/10.1146/annurev-biochem-060614-033910>
- 901 Wittamer, V., Franssen, J. D., Vulcano, M., Mirjolet, J. F., Le Poul, E., Migeotte, I., Brezillon,  
902 S., Tyldesley, R., Blanpain, C., Detheux, M., Mantovani, A., Sozzani, S., Vassart, G.,  
903 Parmentier, M., & Communi, D. (2003). Specific recruitment of antigen-presenting  
904 cells by chemerin, a novel processed ligand from human inflammatory fluids. *J Exp*  
905 *Med*, 198(7), 977-985. <https://doi.org/10.1084/jem.20030382>
- 906 Wittamer, V., Gregoire, F., Robberecht, P., Vassart, G., Communi, D., & Parmentier, M.  
907 (2004). The C-terminal nonapeptide of mature chemerin activates the chemerin  
908 receptor with low nanomolar potency. *J Biol Chem*, 279(11), 9956-9962.  
909 <https://doi.org/10.1074/jbc.M313016200>
- 910 Zabel, B. A., Allen, S. J., Kulig, P., Allen, J. A., Cichy, J., Handel, T. M., & Butcher, E. C.  
911 (2005). Chemerin activation by serine proteases of the coagulation, fibrinolytic, and

- 912 inflammatory cascades. *J Biol Chem*, 280(41), 34661-34666.  
913 <https://doi.org/10.1074/jbc.M504868200>
- 914 Zabel, B. A., Nakae, S., Zuniga, L., Kim, J. Y., Ohyama, T., Alt, C., Pan, J., Suto, H., Soler,  
915 D., Allen, S. J., Handel, T. M., Song, C. H., Galli, S. J., & Butcher, E. C. (2008). Mast  
916 cell-expressed orphan receptor CCRL2 binds chemerin and is required for optimal  
917 induction of IgE-mediated passive cutaneous anaphylaxis. *J Exp Med*, 205(10),  
918 2207-2220. <https://doi.org/10.1084/jem.20080300>
- 919 Zabel, B. A., Silverio, A. M., & Butcher, E. C. (2005). Chemokine-like receptor 1 expression  
920 and chemerin-directed chemotaxis distinguish plasmacytoid from myeloid dendritic  
921 cells in human blood. *J Immunol*, 174(1), 244-251.  
922 <https://doi.org/10.4049/jimmunol.174.1.244>
- 923 Zheng, C., Chen, D., Zhang, Y., Bai, Y., Huang, S., Zheng, D., Liang, W., She, S., Peng, X.,  
924 Wang, P., Mo, X., Song, Q., Lv, P., Huang, J., Ye, R. D., & Wang, Y. (2018).  
925 FAM19A1 is a new ligand for GPR1 that modulates neural stem-cell proliferation and  
926 differentiation. *FASEB J*, fj201800020RRR. <https://doi.org/10.1096/fj.201800020RRR>
- 927 Zhou, Q., Yang, D., Wu, M., Guo, Y., Guo, W., Zhong, L., Cai, X., Dai, A., Jang, W.,  
928 Shakhnovich, E. I., Liu, Z. J., Stevens, R. C., Lambert, N. A., Babu, M. M., Wang, M.  
929 W., & Zhao, S. (2019). Common activation mechanism of class A GPCRs. *Elife*, 8.  
930 <https://doi.org/10.7554/eLife.50279>
- 931 Zhu, Y., Lin, X., Zong, X., Han, S., Wang, M., Su, Y., Ma, L., Chu, X., Yi, C., Zhao, Q., & Wu,  
932 B. (2022). Structural basis of FPR2 in recognition of Abeta42 and neuroprotection by  
933 humanin. *Nat Commun*, 13(1), 1775. <https://doi.org/10.1038/s41467-022-29361-x>
- 934 Zhuang, Y., Liu, H., Edward Zhou, X., Kumar Verma, R., de Waal, P. W., Jang, W., Xu, T.  
935 H., Wang, L., Meng, X., Zhao, G., Kang, Y., Melcher, K., Fan, H., Lambert, N. A., Eric  
936 Xu, H., & Zhang, C. (2020). Structure of formylpeptide receptor 2-Gi complex reveals  
937 insights into ligand recognition and signaling. *Nat Commun*, 11(1), 885.  
938 <https://doi.org/10.1038/s41467-020-14728-9>
- 939 Zhuang, Y., Wang, L., Guo, J., Sun, D., Wang, Y., Liu, W., Xu, H. E., & Zhang, C. (2022).  
940 Molecular recognition of formylpeptides and diverse agonists by the formylpeptide  
941 receptors FPR1 and FPR2. *Nat Commun*, 13(1), 1054.  
942 <https://doi.org/10.1038/s41467-022-28586-0>

943
